# Supplementary material for: Longitudinal monitoring by next‐generation sequencing of plasma cell‐free DNA in ALK rearranged NSCLC patients treated with ALK tyrosine kinase inhibitors
Source: PubMed Central journal article supplement (PMC9359877; doi:10.1002/cam4.4663), 2022-04-19

# Supplementary figure 1

**A**

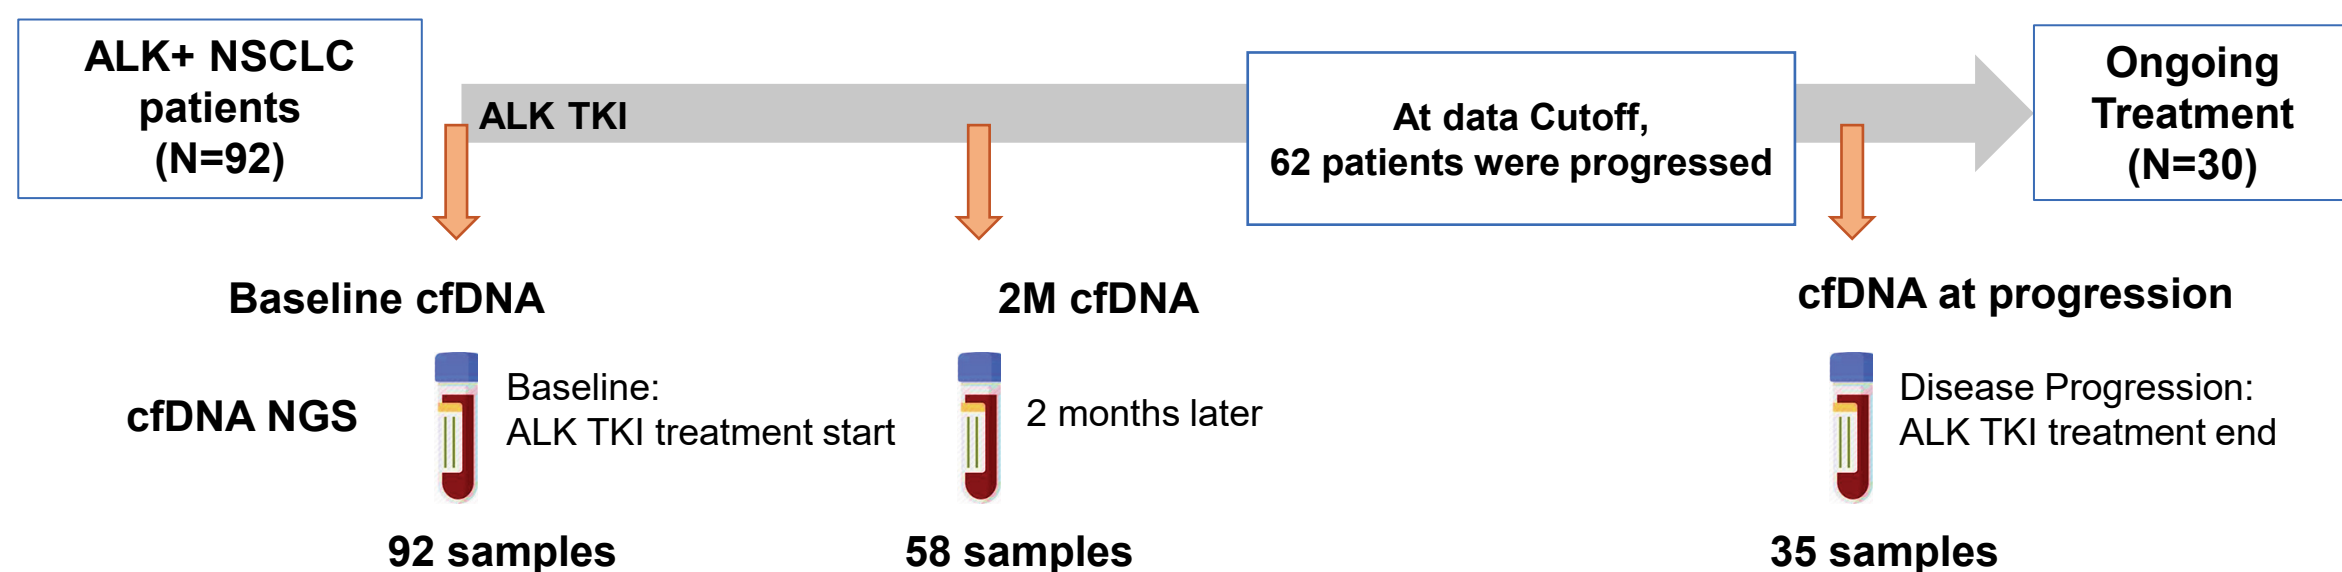

**B**

| Point Mutations (SNVs)<br>(73 Genes) |        |              |             |             |            | Indels<br>(23 Genes) |        | Amplifications<br>(18 Genes) |        | Fusions<br>(6 Genes) |
|--------------------------------------|--------|--------------|-------------|-------------|------------|----------------------|--------|------------------------------|--------|----------------------|
| AKT1                                 | ALK    | APC          | AR          | ARAF        | ARID1A     | ATM                  | APC    | AR                           | BRAF   | ALK                  |
| ATM                                  | BRAF   | BRCA1        | BRCA2       | CCND1       | CCND2      | ARID1A               | BRCA1  | CCND1                        | CCND2  | FGFR2                |
| CCNE1                                | CDH1   | CDK4         | CDK6        | CDKN2A      | CTNNB1     | BRCA2                | CDH1   | CCNE1                        | CDK4   | FGFR3                |
| DDR2                                 | EGFR   | ERBB2 (HER2) | ESR1        | EZH2        | FBXW7      | CDKN2A               | EGFR   | CDK6                         | EGFR   | NTRK1                |
| FGFR1                                | FGFR2  | FGFR3        | GATA3       | GNA11       | GNAQ       | ERBB2                | GATA3  | ERBB2                        | FGFR1  | RET                  |
| GNAS                                 | HNF1A  | HRAS         | IDH1        | IDH2        | JAK2       | KIT                  | MET    | FGFR2                        | KIT    | ROS1                 |
| JAK3                                 | KIT    | KRAS         | MAP2K1/MEK1 | MAP2K2/MEK2 | MAPK1/ERK2 | MLH1                 | MTOR   | KRAS                         | MET    |                      |
| MAPK3/ERK1                           | MET    | MLH1         | MPL         | MTOR        | MYC        | NF1                  | PDGFRA | MYC                          | PDGFRA |                      |
| NF1                                  | NPM1   | NOTCH1       | NFE2L2      | NRAS        | NTRK1      | PTEN                 | RB1    | PIK3CA                       | RAF1   |                      |
| NTRK3                                | PDGFRA | PIK3CA       | PTEN        | PTPN11      | RAF1       | SMAD4                | STK11  |                              |        |                      |
| RB1                                  | RET    | RHEB         | RHOA        | RIT1        | ROS1       | TP53                 | TSC1   |                              |        |                      |
| SMAD4                                | SMO    | STK11        | TERT†       | TP53        | SC1        | VHL                  |        |                              |        |                      |
| VHL                                  |        |              |             |             |            |                      |        |                              |        |                      |

\*Exons selected to maximize detection of known somatic mutations / † Includes TERT promoter region

# Supplementary figure 2

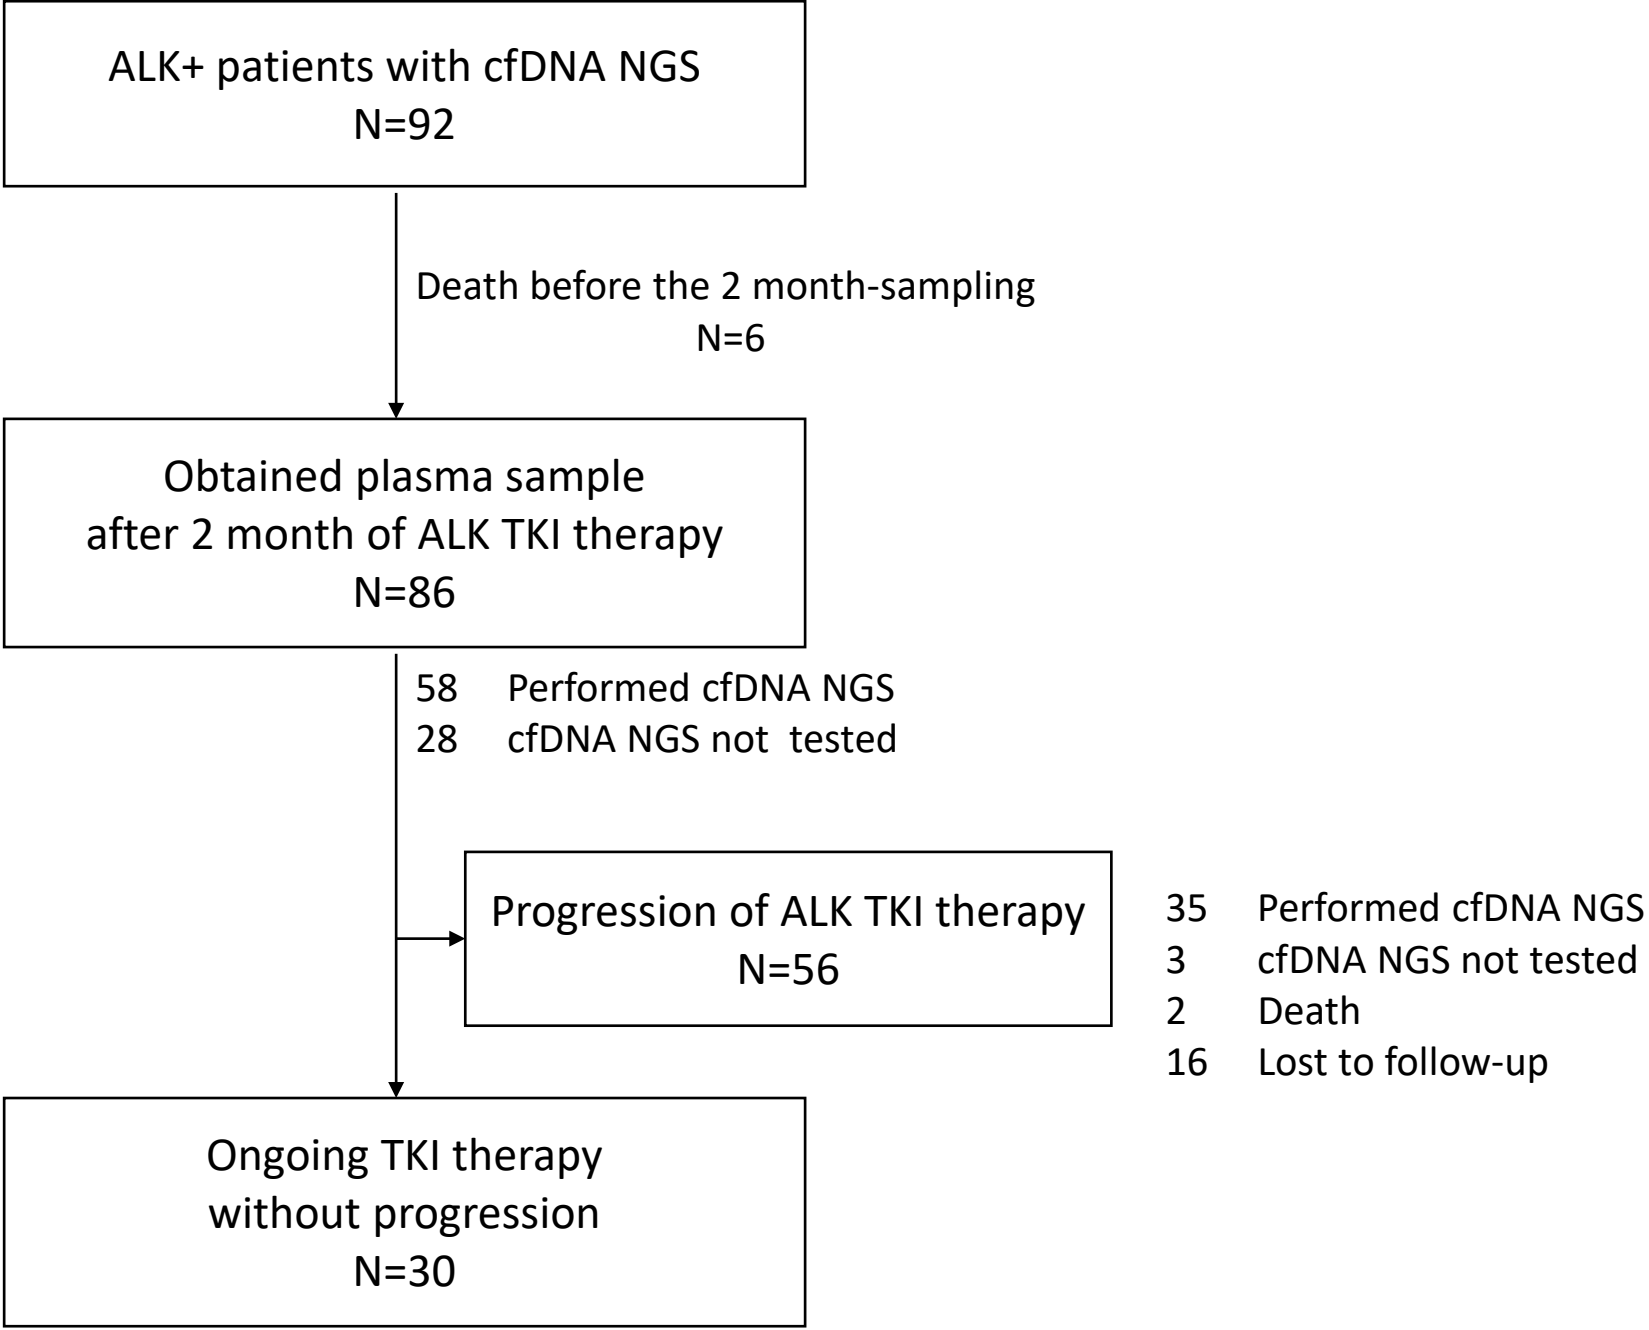

# Supplementary figure 3

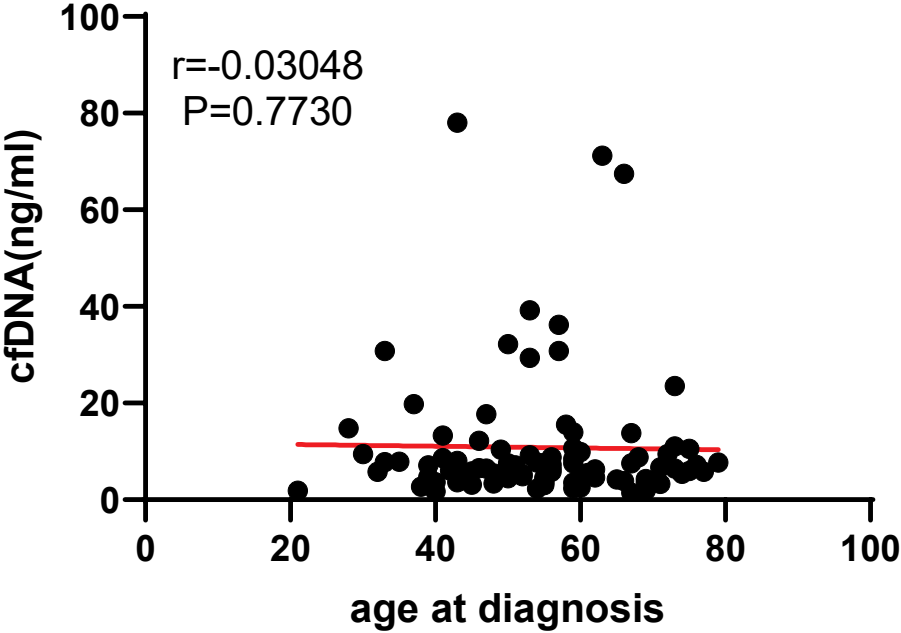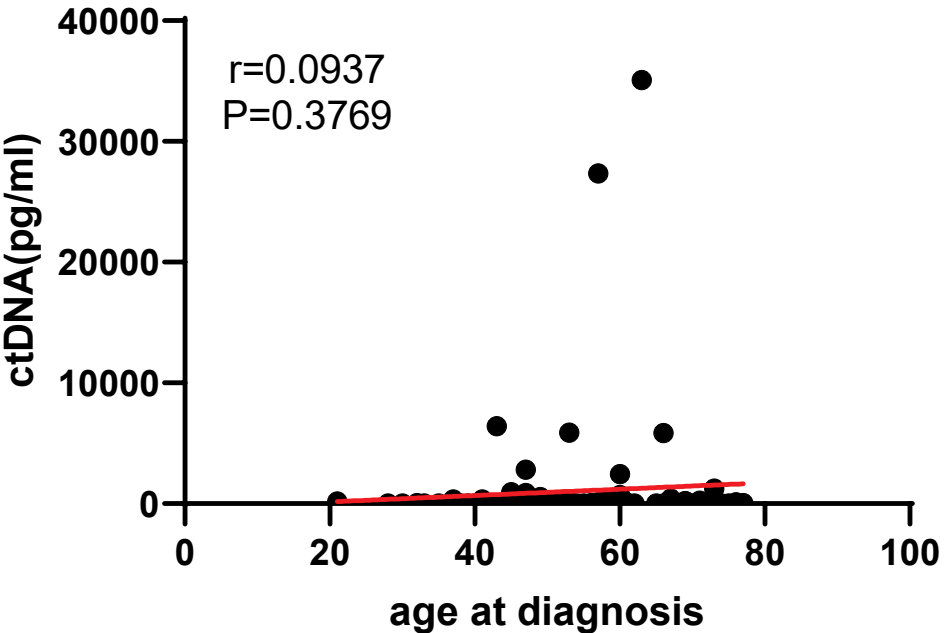

# Supplementary figure 4

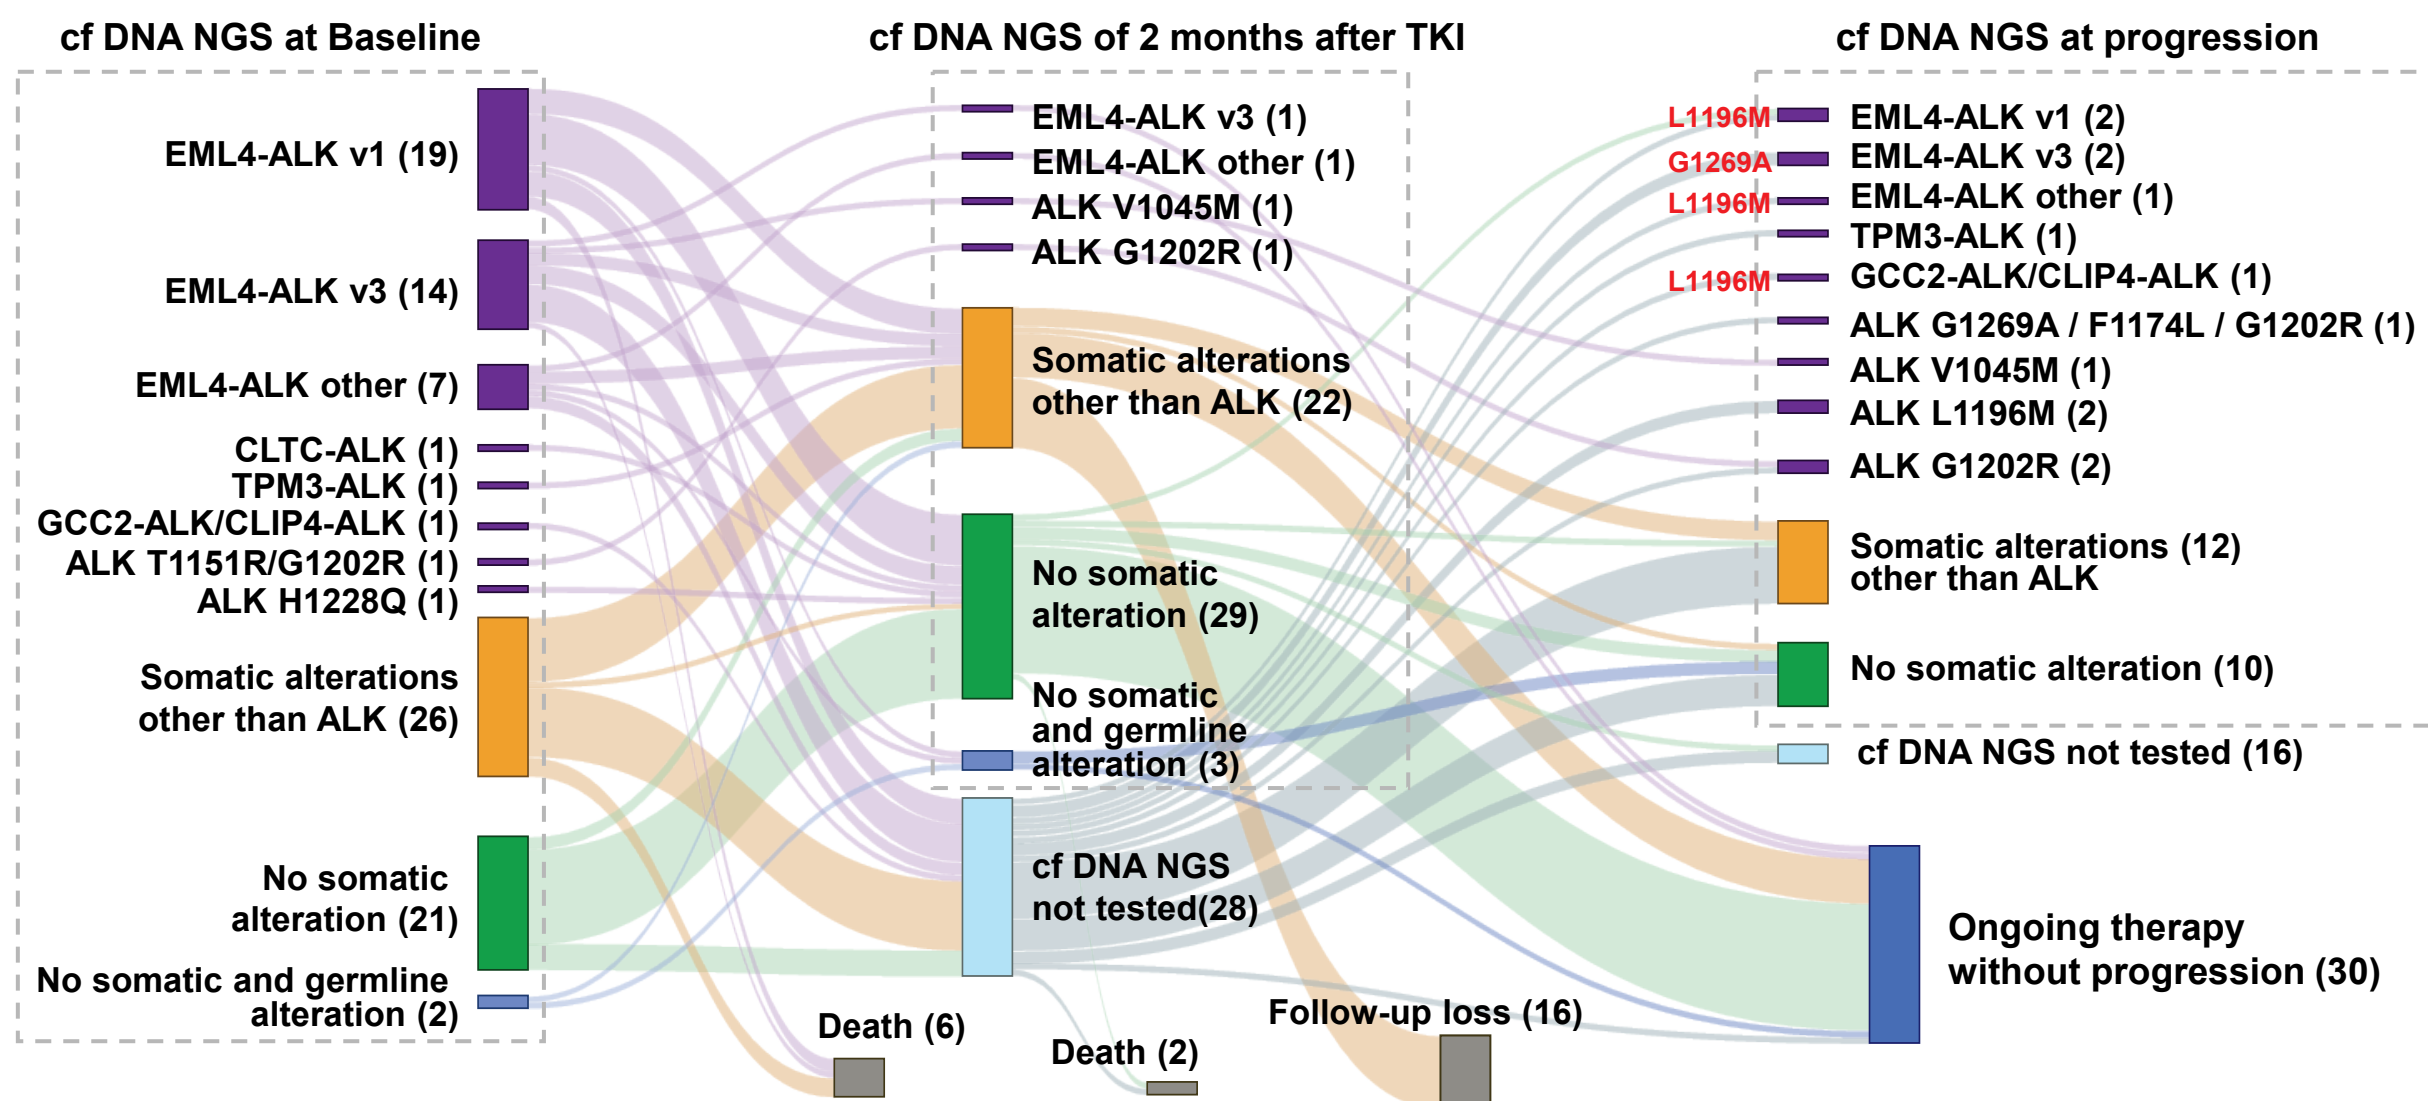

## Supplementary figure 5

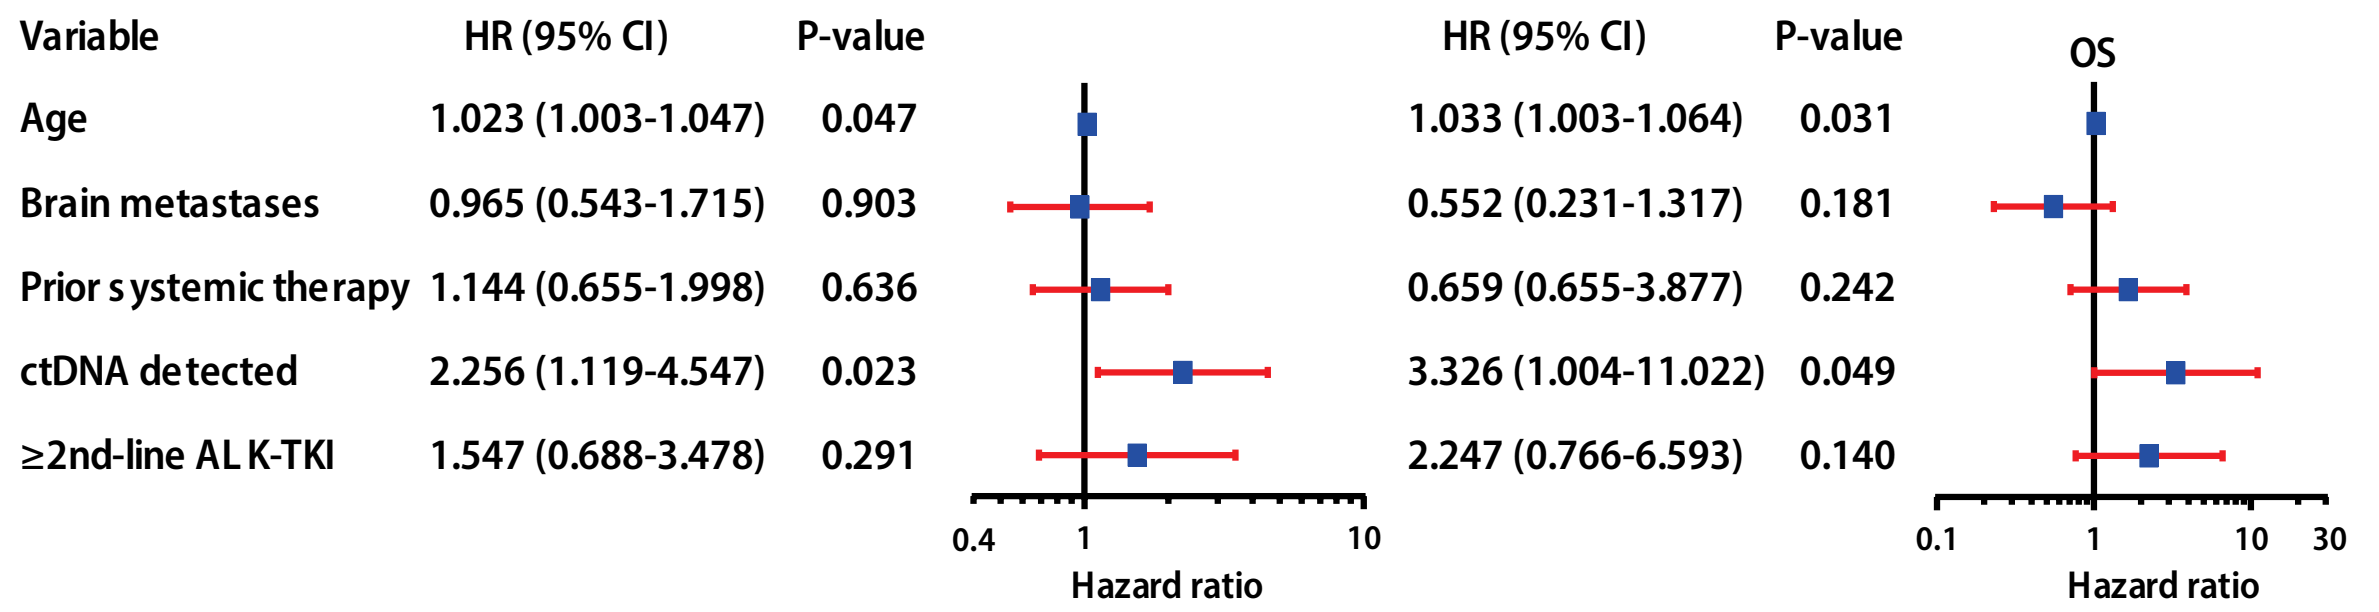

# Supplementary figure 6

**A**

## First-line Crizotinib subgroup

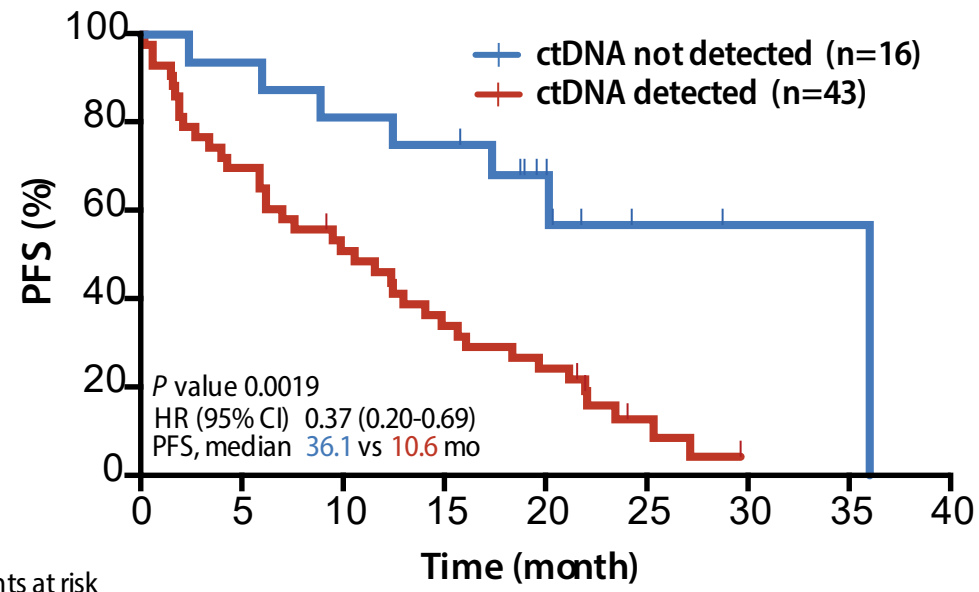

## First-line Crizotinib subgroup

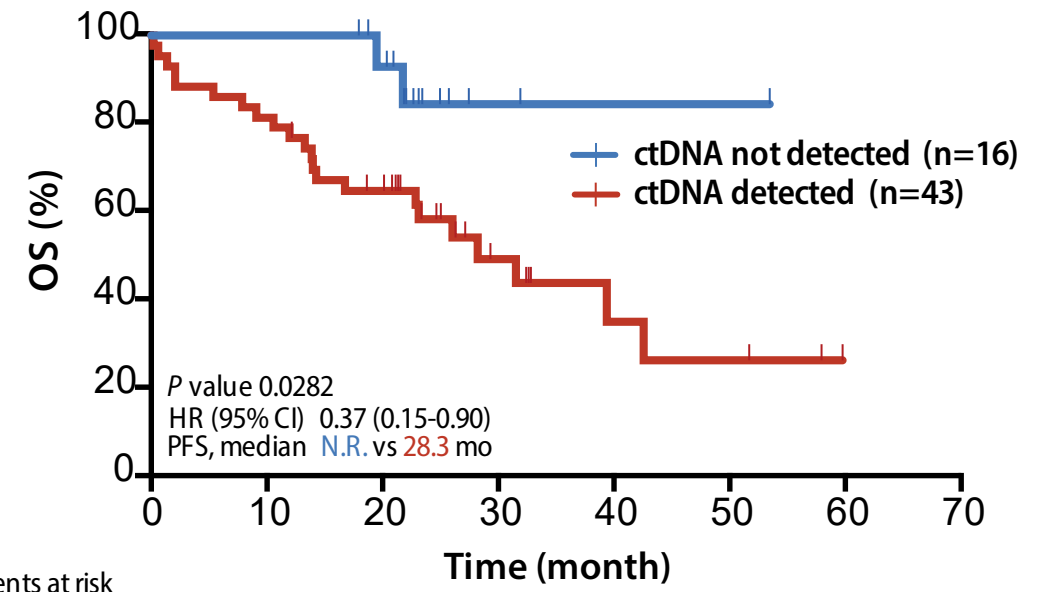

Patients at risk

|                    |    |    |    |    |    |   |   |   |   |
|--------------------|----|----|----|----|----|---|---|---|---|
| ctDNA not detected | 16 | 15 | 13 | 12 | 7  | 2 | 1 | 1 | 0 |
| ctDNA detected     | 43 | 30 | 21 | 14 | 10 | 3 | 0 | 0 | 0 |

Patients at risk

|                    |    |    |    |   |   |   |   |   |
|--------------------|----|----|----|---|---|---|---|---|
| ctDNA not detected | 16 | 16 | 13 | 2 | 1 | 1 | 0 | 0 |
| ctDNA detected     | 43 | 35 | 26 | 9 | 4 | 3 | 0 | 0 |

**B**

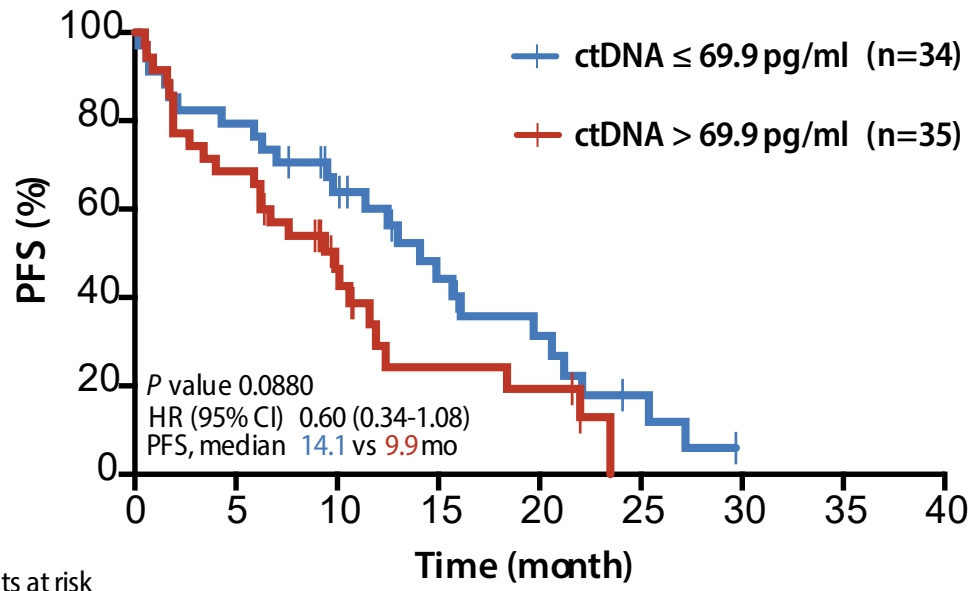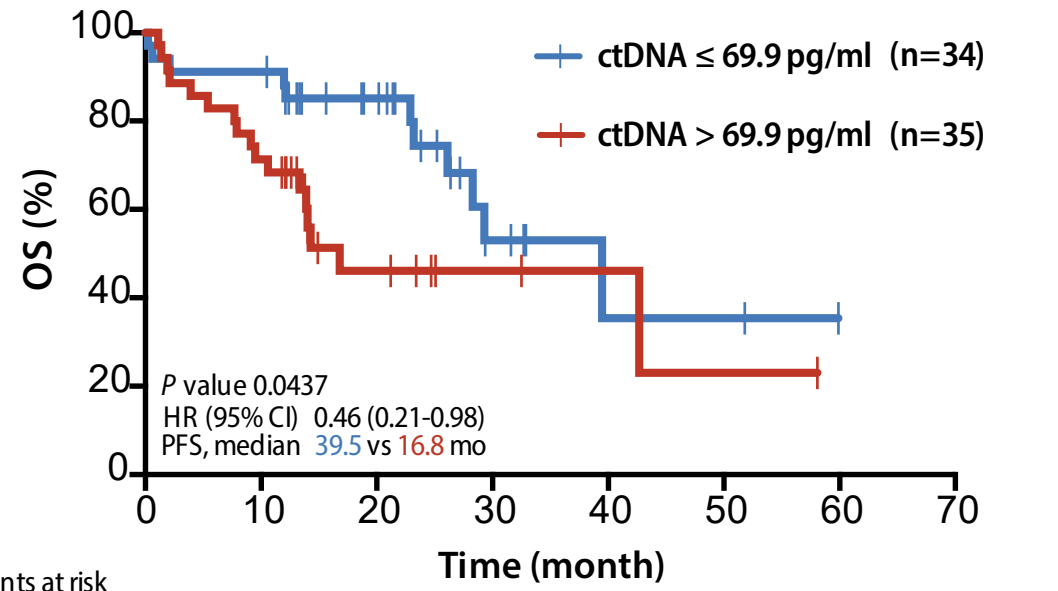

Patients at risk

|                    |    |    |    |    |   |   |   |   |   |
|--------------------|----|----|----|----|---|---|---|---|---|
| ctDNA ≤ 69.9 pg/ml | 34 | 27 | 19 | 11 | 7 | 3 | 0 | 0 | 0 |
| ctDNA > 69.9 pg/ml | 35 | 24 | 12 | 5  | 4 | 0 | 0 | 0 |   |

Patients at risk

|                    |    |    |    |   |   |   |   |   |
|--------------------|----|----|----|---|---|---|---|---|
| ctDNA ≤ 69.9 pg/ml | 34 | 31 | 20 | 6 | 3 | 2 | 0 | 0 |
| ctDNA > 69.9 pg/ml | 35 | 24 | 9  | 3 | 2 | 1 | 0 | 0 |

**C**

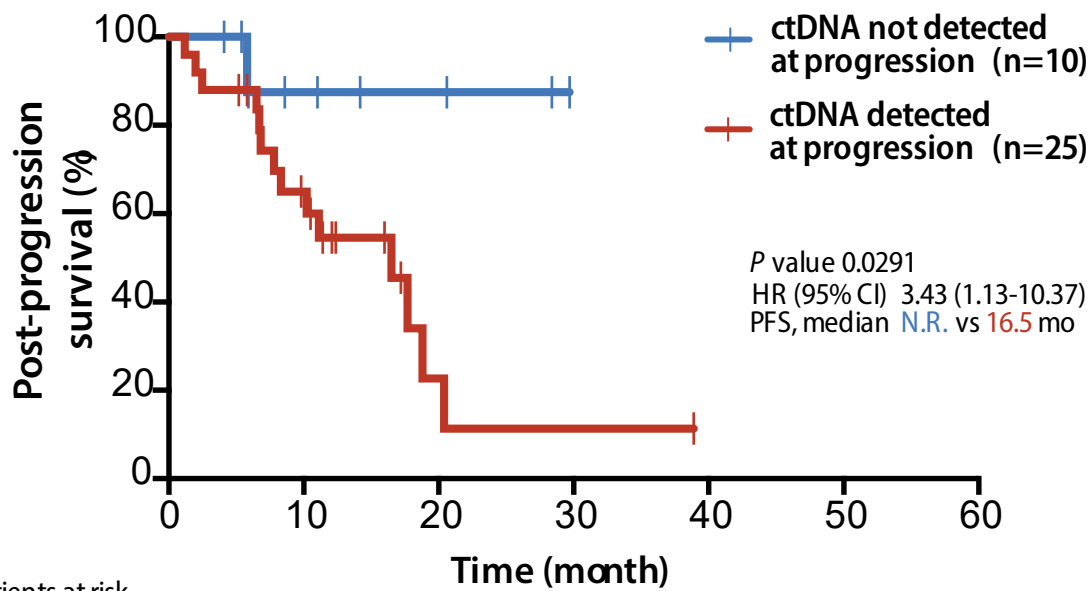

Patients at risk

|                    |    |    |   |   |   |   |   |
|--------------------|----|----|---|---|---|---|---|
| ctDNA Not detected | 10 | 5  | 3 | 0 | 0 | 0 | 0 |
| ctDNA detected     | 16 | 13 | 2 | 1 | 0 | 0 | 0 |

# Supplementary figure 7

**A**

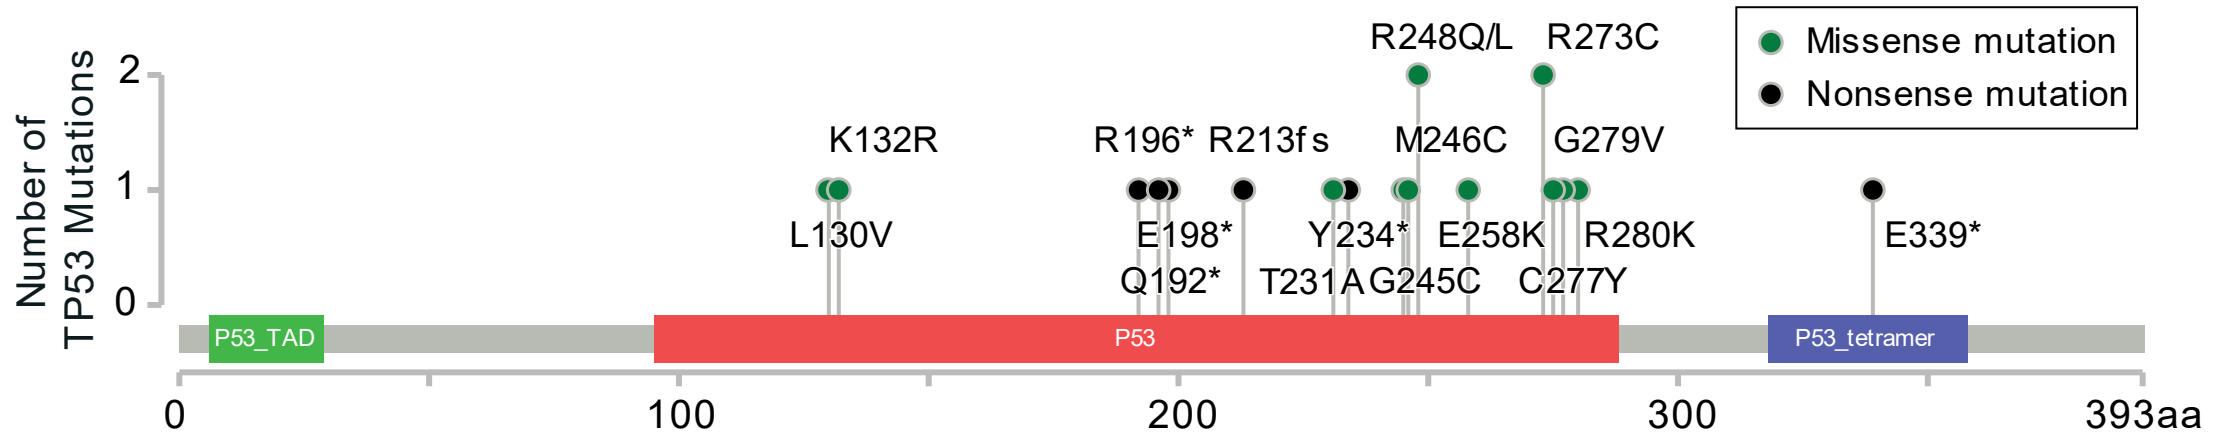

**B**

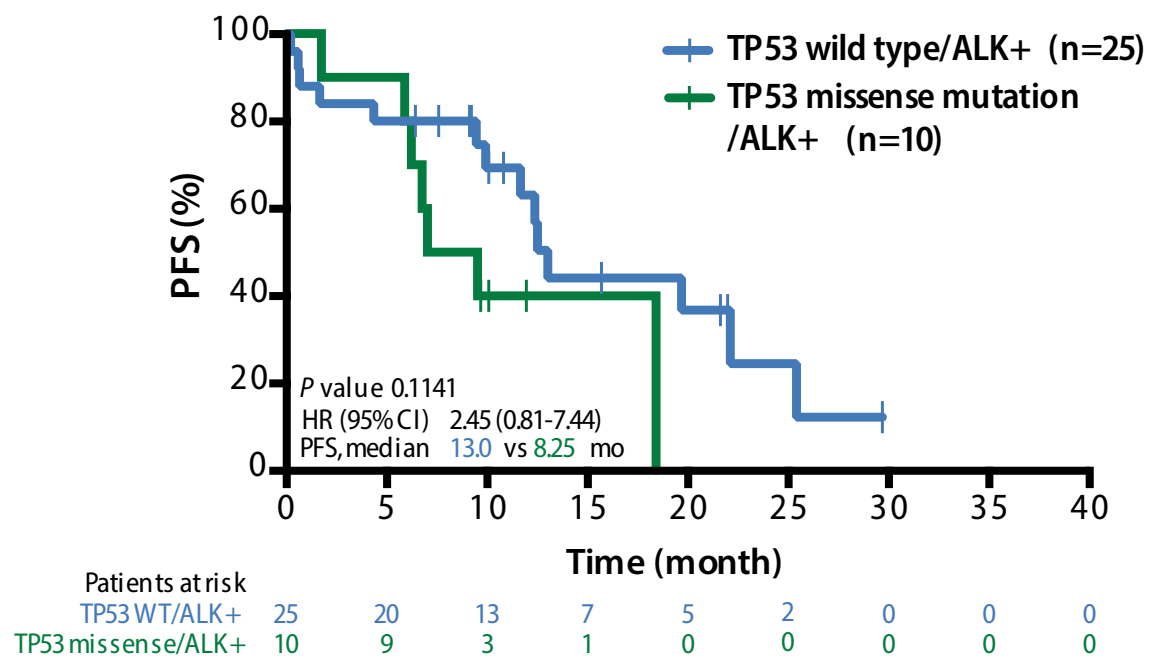

**C**

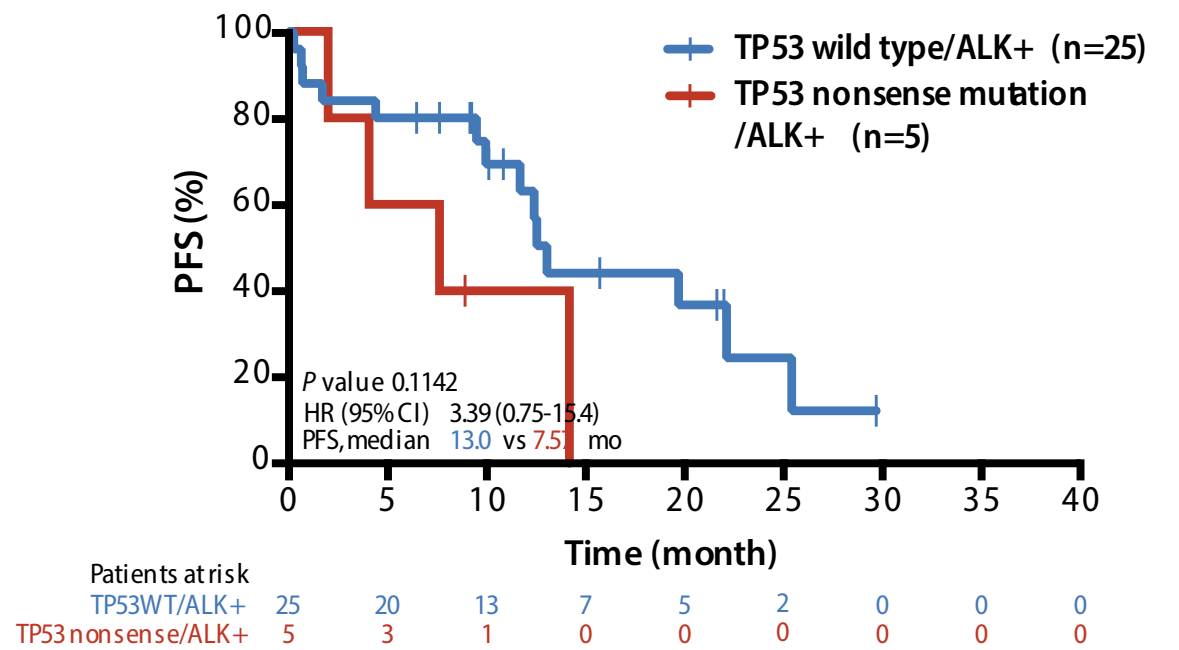

**D**

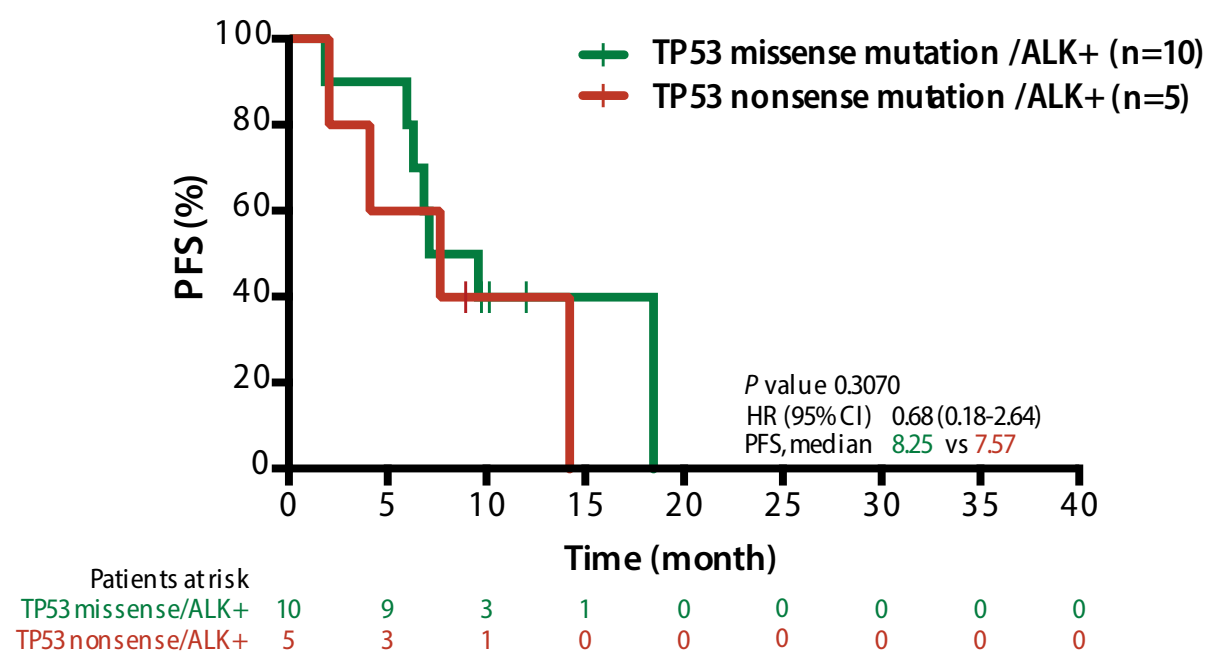

**E**

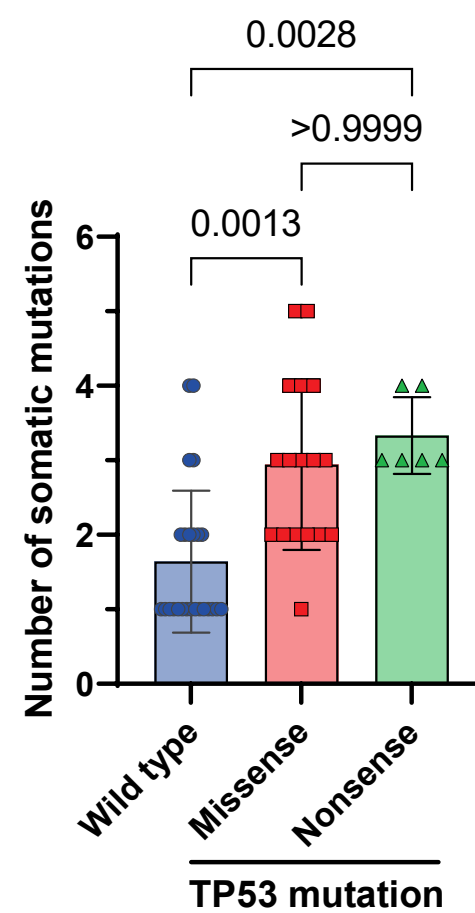

# Supplementary figure 8

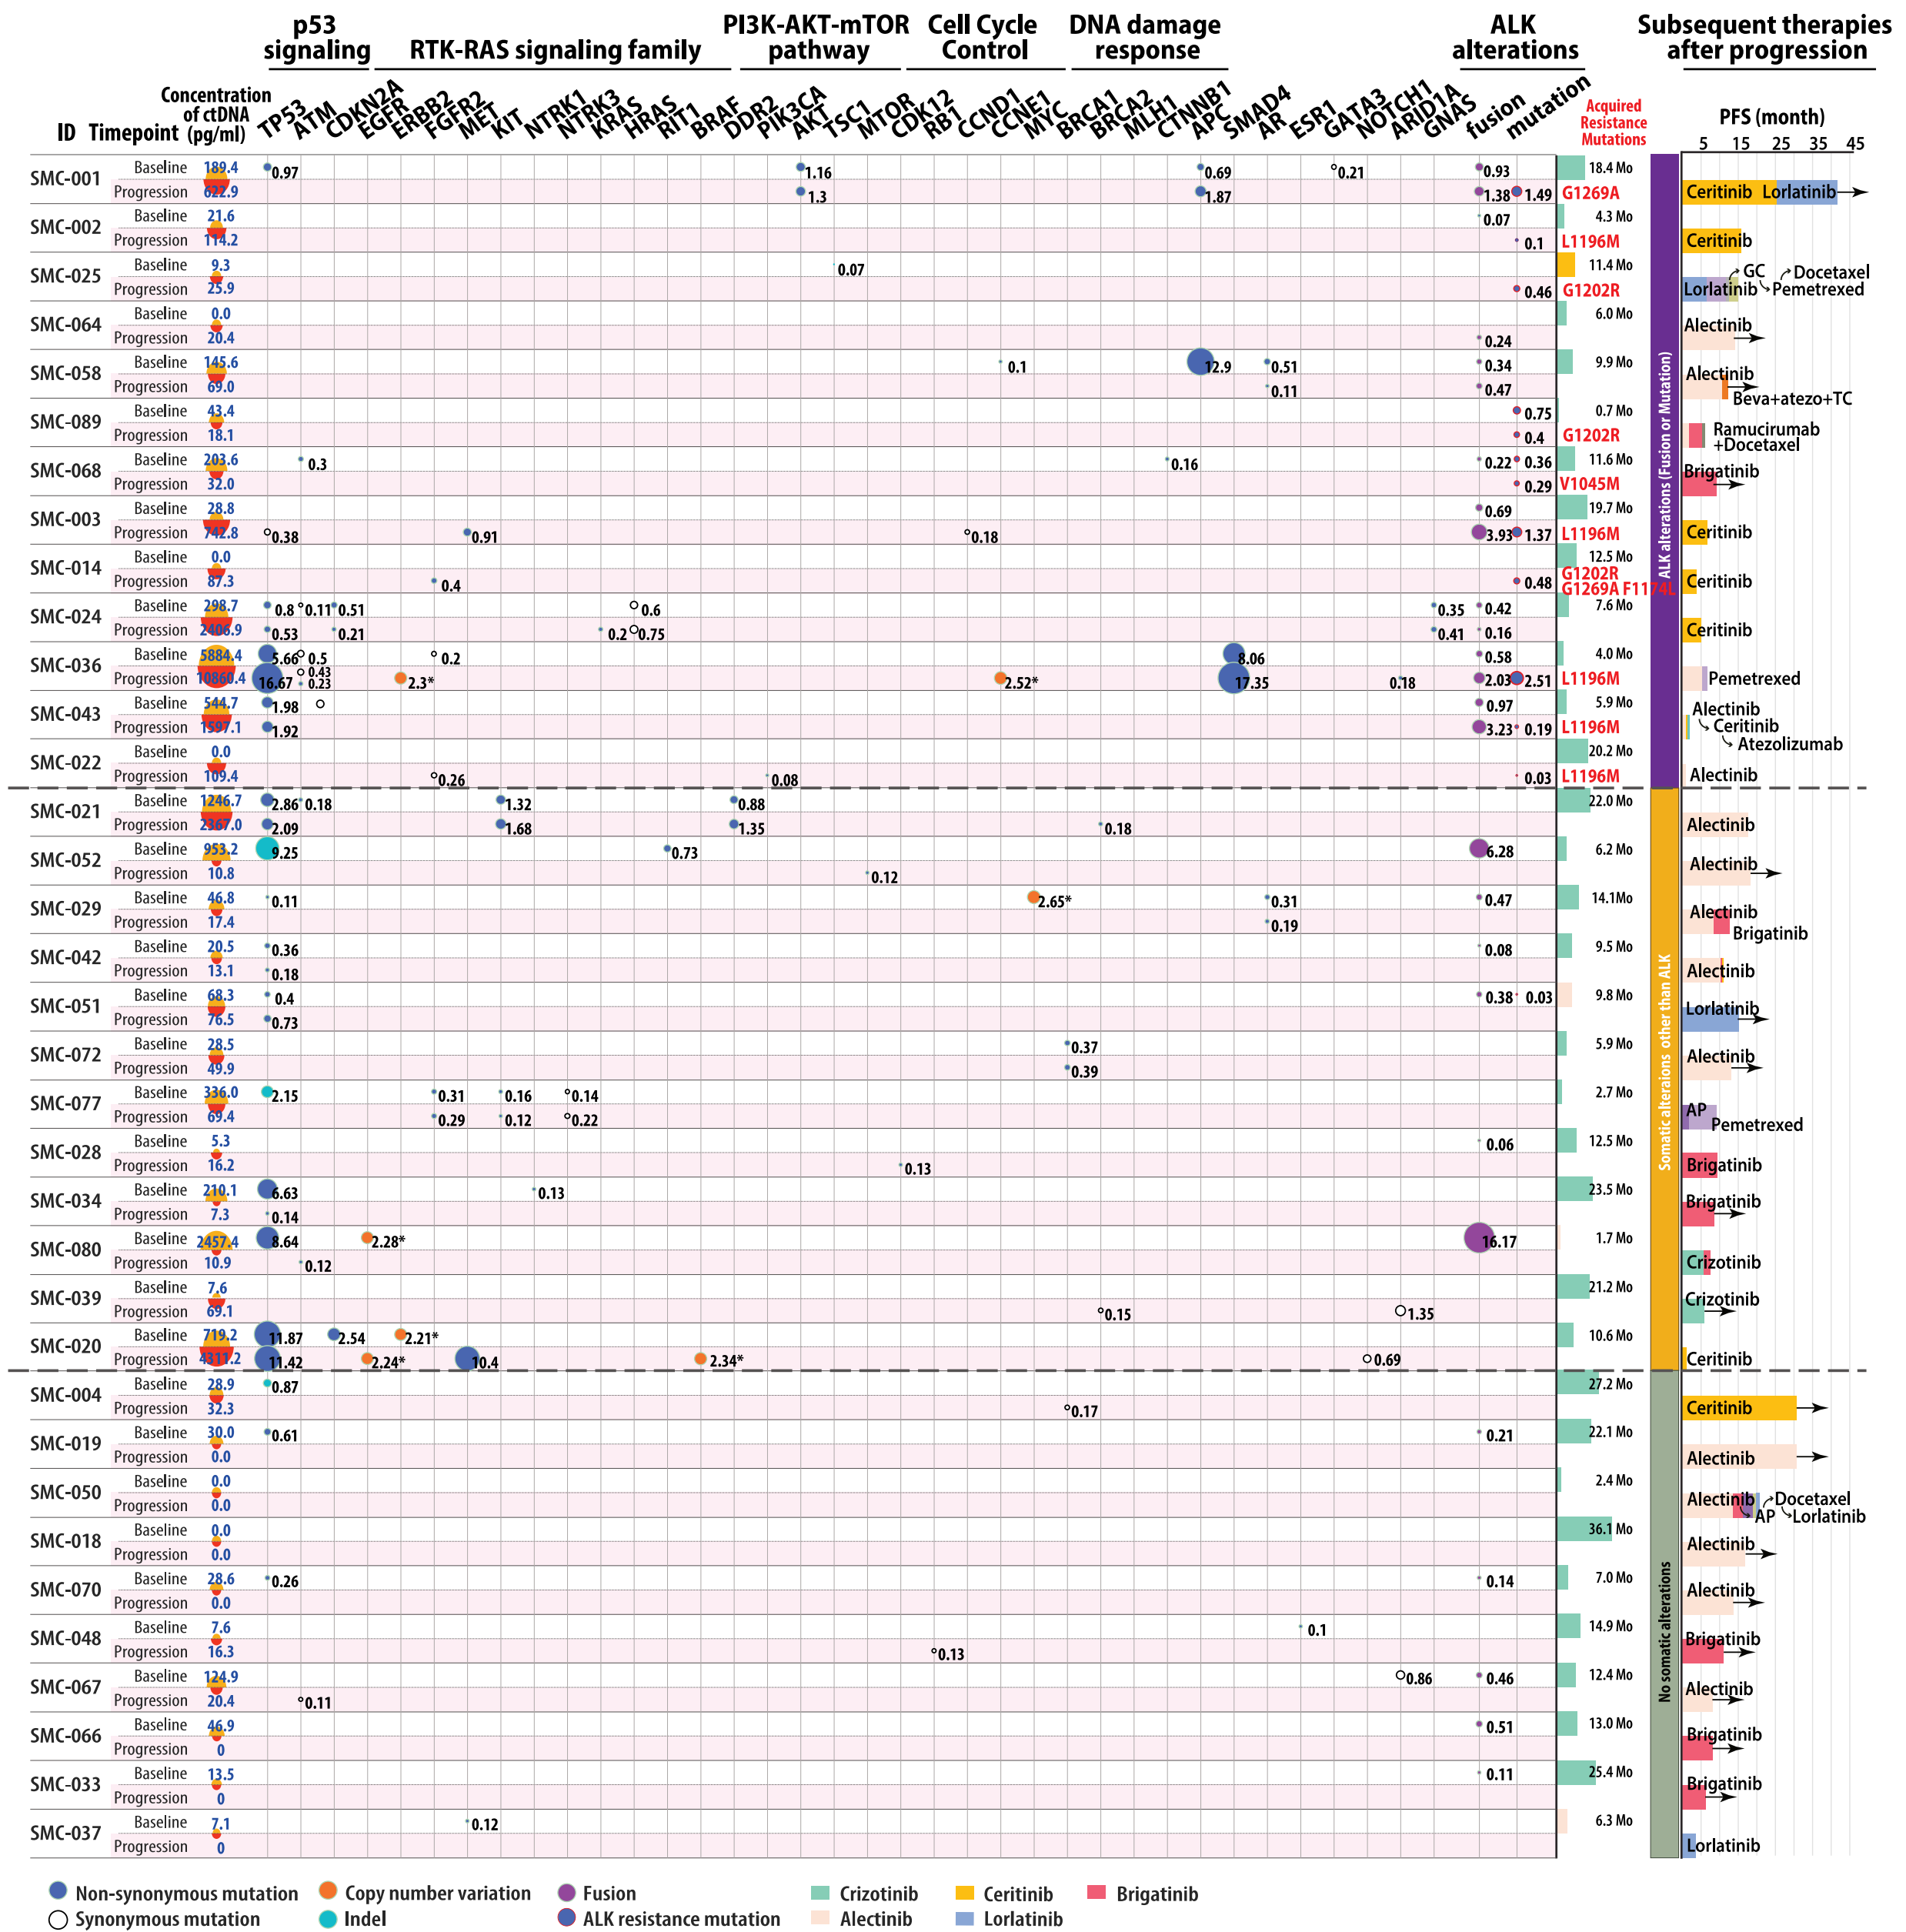

Supplement: CAM4-11-2944-s001.pdf [file CAM4-11-2944-s001.pdf]
